# Supplementary material for: Social-Environmental Conflicts in Chile: Is There Any Potential for an Ecological Constitution?
Source: MDPI journal article supplement (doi:10.3390/su132212701), 2021-11-17
Supplement: s1 [file s1]

Archive with 1 entries (1 files):
- sustainability-1296104-supplementary.pdf
