# Supplementary material for: Social-Environmental Conflicts in Chile: Is There Any Potential for an Ecological Constitution?
Source: MDPI journal article supplement (doi:10.3390/su132212701), 2021-11-17
Supplement: s1 [file s1 › sustainability-1296104-supplementary.pdf]

**Table S1.** Environmental components included in international constitutions.

| Constitution reference | Right to a pollution-free environment | State duty to protect the environment | People's duty to protect the environment | Spatial planning | Water | Forest | Sustainable development | Judicialization |
|------------------------|---------------------------------------|---------------------------------------|------------------------------------------|------------------|-------|--------|-------------------------|-----------------|
| Germany (1949)         |                                       | x                                     |                                          | x                |       |        | x                       | x               |
| Argentina (1853)       | x                                     | x                                     |                                          |                  |       |        | x                       | x               |
| Armenia (1995)         |                                       | x                                     | x                                        |                  |       |        | x                       |                 |
| Australia (1900)       |                                       |                                       |                                          |                  |       |        |                         |                 |
| Bolivia (2009)         | x                                     | x                                     | x                                        | x                | x     | x      | x                       | x               |
| Brazil (1988)          | x                                     | x                                     |                                          | x                | x     | x      | x                       | x               |
| Canada (1867)          |                                       |                                       |                                          |                  |       |        |                         |                 |
| Chile (1980)           | x                                     |                                       |                                          |                  |       |        |                         |                 |
| Colombia (1991)        | x                                     | x                                     | x                                        | x                | x     | x      | x                       | x               |
| Costa Rica (1949)      | x                                     | x                                     |                                          |                  |       |        |                         | x               |
| Ecuador (2008)         | x                                     | x                                     | x                                        | x                | x     | x      | x                       | x               |
| Spain (1978)           | x                                     | x                                     |                                          |                  |       |        |                         | x               |
| United States (1789)   |                                       |                                       |                                          |                  |       |        |                         |                 |
| France (1958)          | x                                     | x                                     | x                                        |                  |       |        | x                       | x               |
| Greece (1975)          |                                       | x                                     |                                          | x                |       | x      |                         |                 |
| Iceland (1944)         |                                       |                                       |                                          |                  |       |        |                         |                 |
| Japan (1947)           |                                       |                                       |                                          |                  | x     |        |                         |                 |
| Kenya (2010)           | x                                     | x                                     | x                                        | x                |       | x      | x                       | x               |
| Kuwait (1962)          |                                       |                                       |                                          |                  |       |        |                         |                 |
| Mexico (1917)          | x                                     |                                       |                                          |                  | x     |        |                         | x               |
| Norway (1814)          | x                                     |                                       |                                          |                  |       |        |                         |                 |
| Paraguay (1992)        | x                                     | x                                     |                                          |                  |       |        |                         | x               |
| Peru (1993)            |                                       | x                                     |                                          |                  |       | x      | x                       |                 |
| Romania (1991)         |                                       | x                                     |                                          |                  |       |        |                         |                 |
| South Africa (1996)    | x                                     | x                                     |                                          | x                | x     |        | x                       | x               |
| Sweden (1974)          |                                       |                                       |                                          |                  |       |        |                         |                 |
| Switzerland (1999)     | x                                     | x                                     |                                          | x                | x     | x      | x                       | x               |

Continued...

| Constitution reference | Right to a<br>pollution-free<br>environment | State duty to<br>protect the<br>environment | People's duty to<br>protect the<br>environment | Spatial<br>planning | Water        | Forest       | Sustainable<br>development | Judicialization |
|------------------------|---------------------------------------------|---------------------------------------------|------------------------------------------------|---------------------|--------------|--------------|----------------------------|-----------------|
| Thailand (2007)        |                                             | x                                           |                                                | x                   | x            |              | x                          | x               |
| Uruguay (1967)         |                                             | x                                           | x                                              | x                   | x            |              | x                          | x               |
| Venezuela (1999)       | x                                           | x                                           |                                                | x                   | x            |              | x                          | x               |
| Zimbabwe (2013)        | x                                           | x                                           |                                                | x                   | x            |              | x                          | x               |
| <b>Include</b>         | <b>54.8%</b>                                | <b>67.6%</b>                                | <b>22.6%</b>                                   | <b>41.9%</b>        | <b>38.7%</b> | <b>22.6%</b> | <b>51.6%</b>               | <b>3.2%</b>     |
